# Supplementary material for: Increased Cervical CD4+CCR5+ T Cells Among Kenyan Sex Working Women Using Depot Medroxyprogesterone Acetate
Source: PubMed Central journal article supplement (PMC6434599; doi:10.1089/aid.2018.0188), 2019-02-28
Supplement: Supp_Fig2.pdf [file Supp_Fig2.pdf]

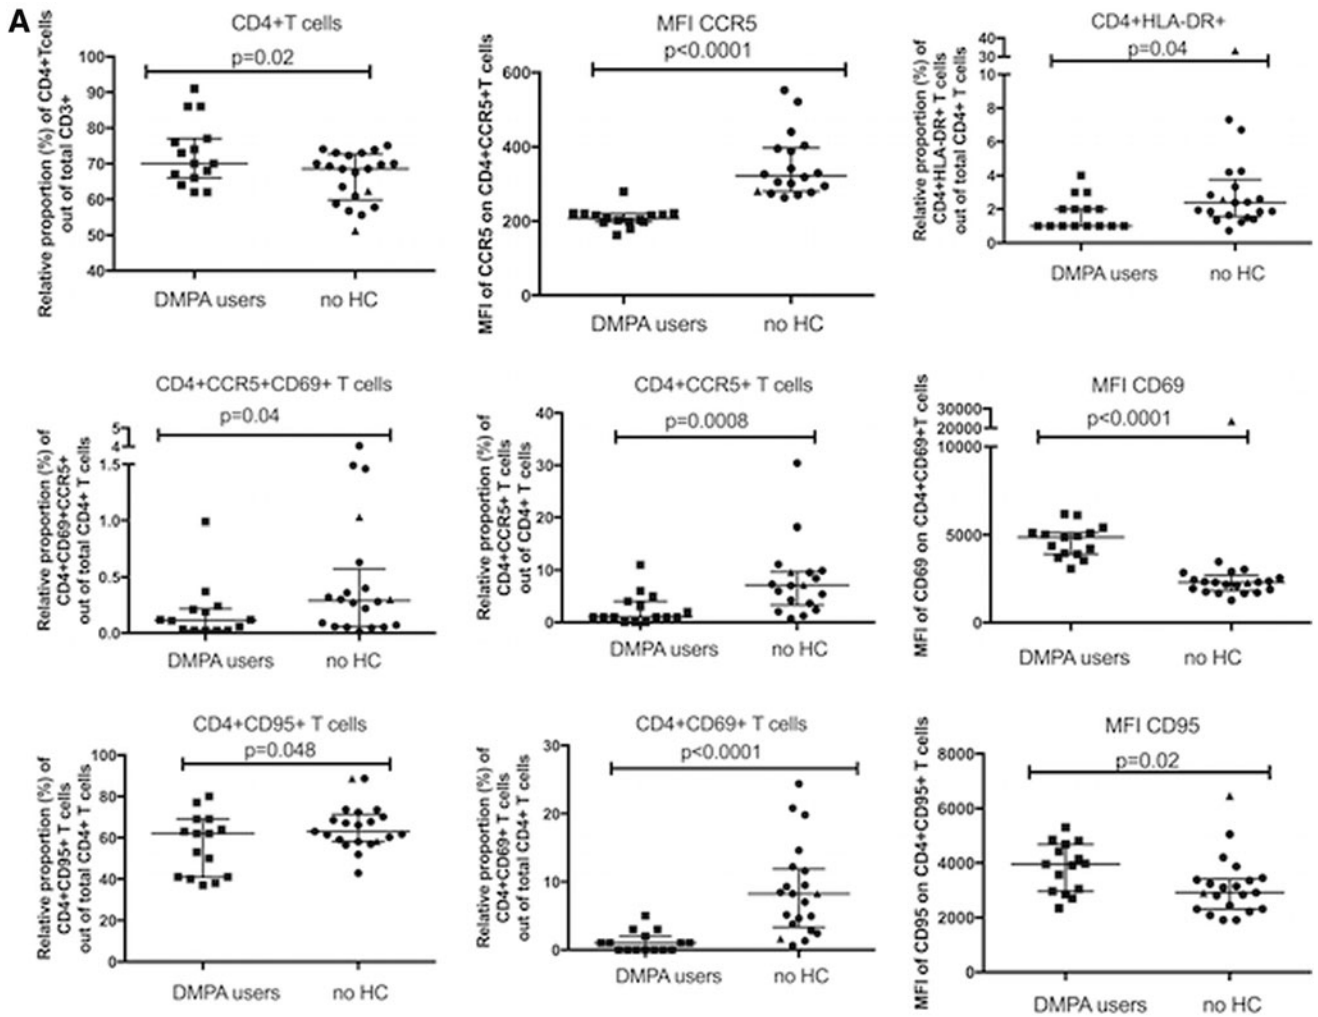

**SUPPLEMENTARY FIG. S2.** The impact of DMPA on the systemic immune system after univariate analyses. (A) PBMC expression of cellular markers of activation and HIV co-receptor assessed by flow cytometry; (B) Expression of proinflammatory cytokines and chemokines derived from plasma. *p*-Values are from the univariate analyses; graphs are presented with median and interquartile range; “▲” indicate participants STIs positive. ■, DMPA users (square); ●, no HC (circle). DMPA, depot medroxyprogesterone acetate; HC, hormonal contraception; MFI, median fluorescence intensity; PBMC, peripheral blood mononuclear cells; STI, sexually transmitted infection.

(continued)

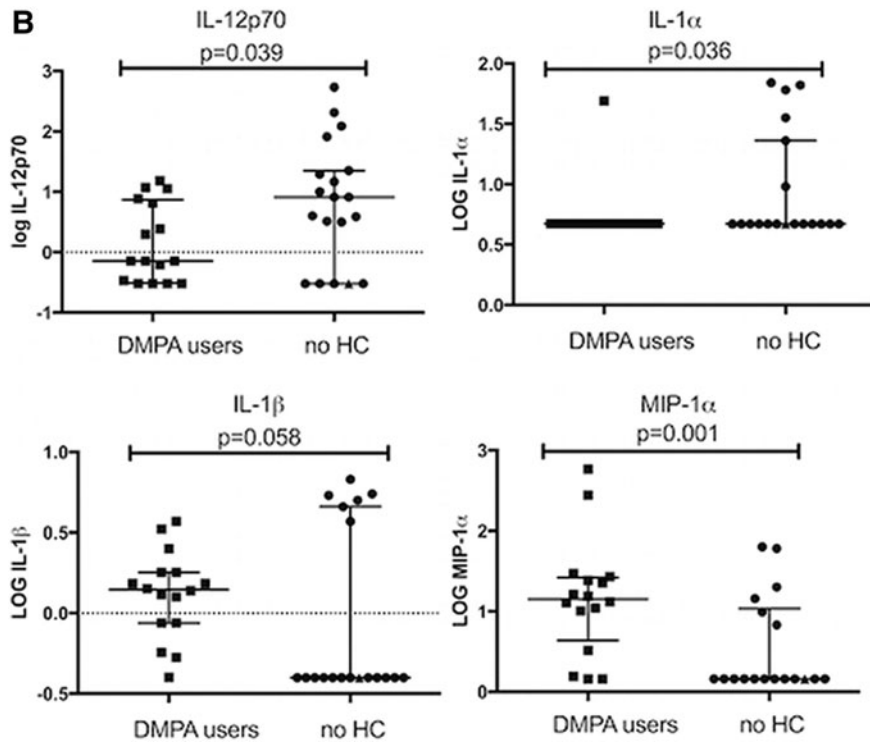

SUPPLEMENTARY FIG. S2. (Continued).
