# Supplementary material for: Increased Cervical CD4+CCR5+ T Cells Among Kenyan Sex Working Women Using Depot Medroxyprogesterone Acetate
Source: PubMed Central journal article supplement (PMC6434599; doi:10.1089/aid.2018.0188), 2019-02-28
Supplement: Supp_Fig3.pdf [file Supp_Fig3.pdf]

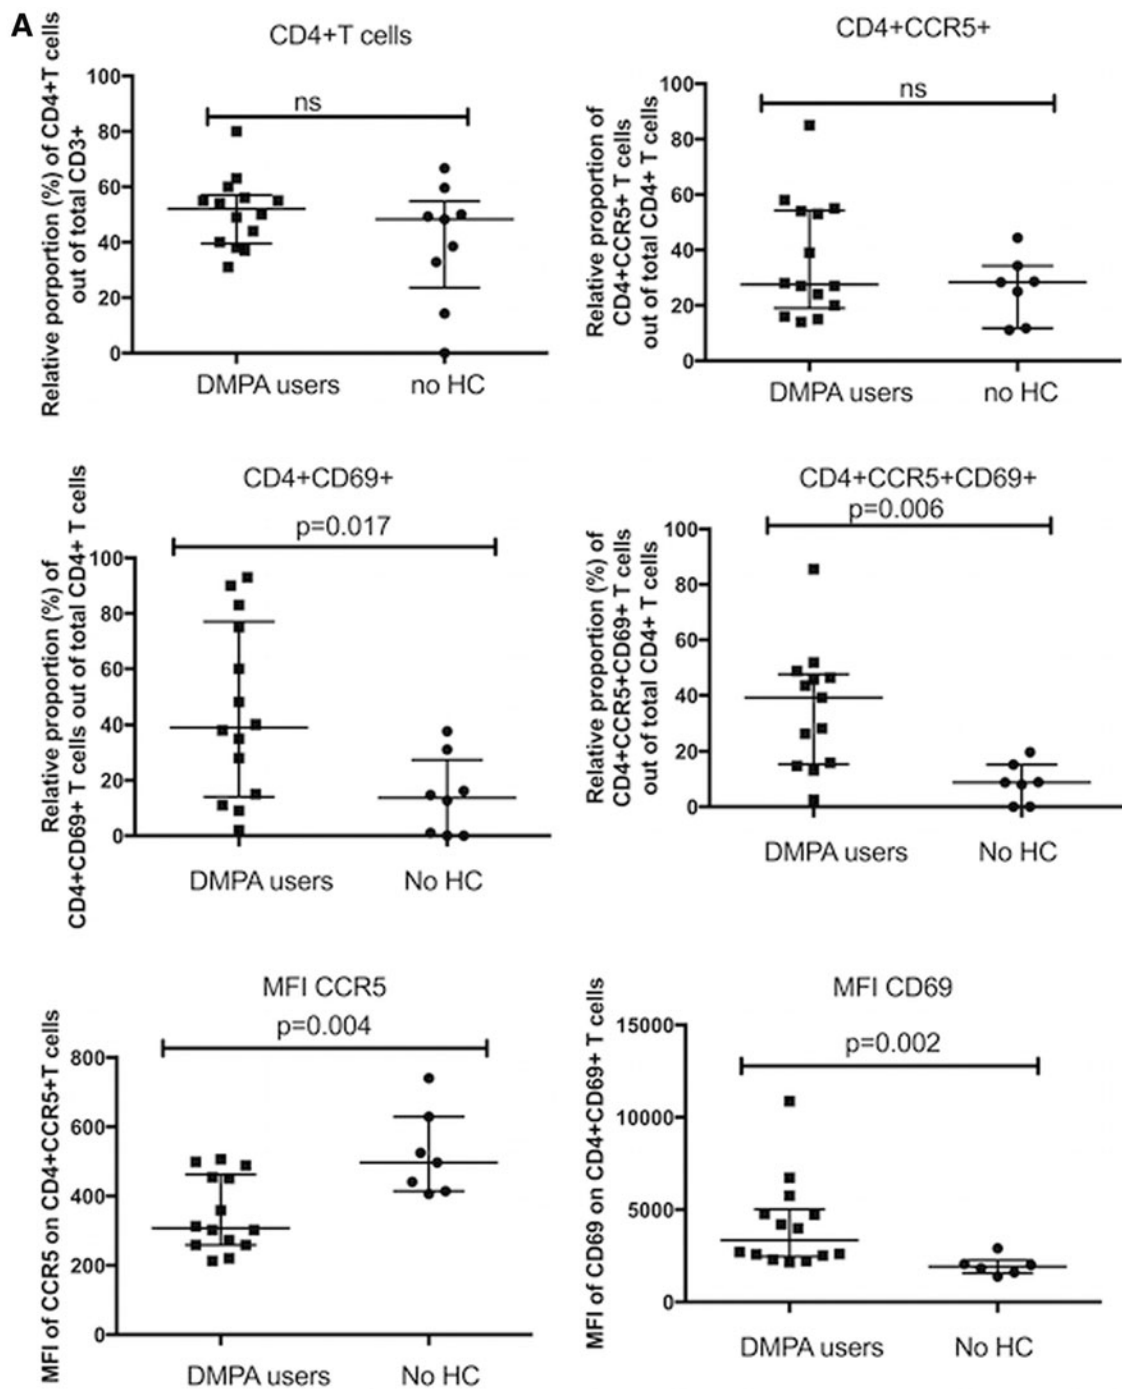

**SUPPLEMENTARY FIG. S3.** The impact of DMPA on mucosal milieu after univariate analyses. **(A)** Expression of cellular markers of activation and HIV co-receptors on CMCs as assessed by flow cytometry. **(B)** Expression of the proinflammatory chemokine in the CVL.  $p$ -Values are from the univariate analyses; graphs are presented as median and interquartile range. CVL, cervico-vaginal lavage.

(continued)

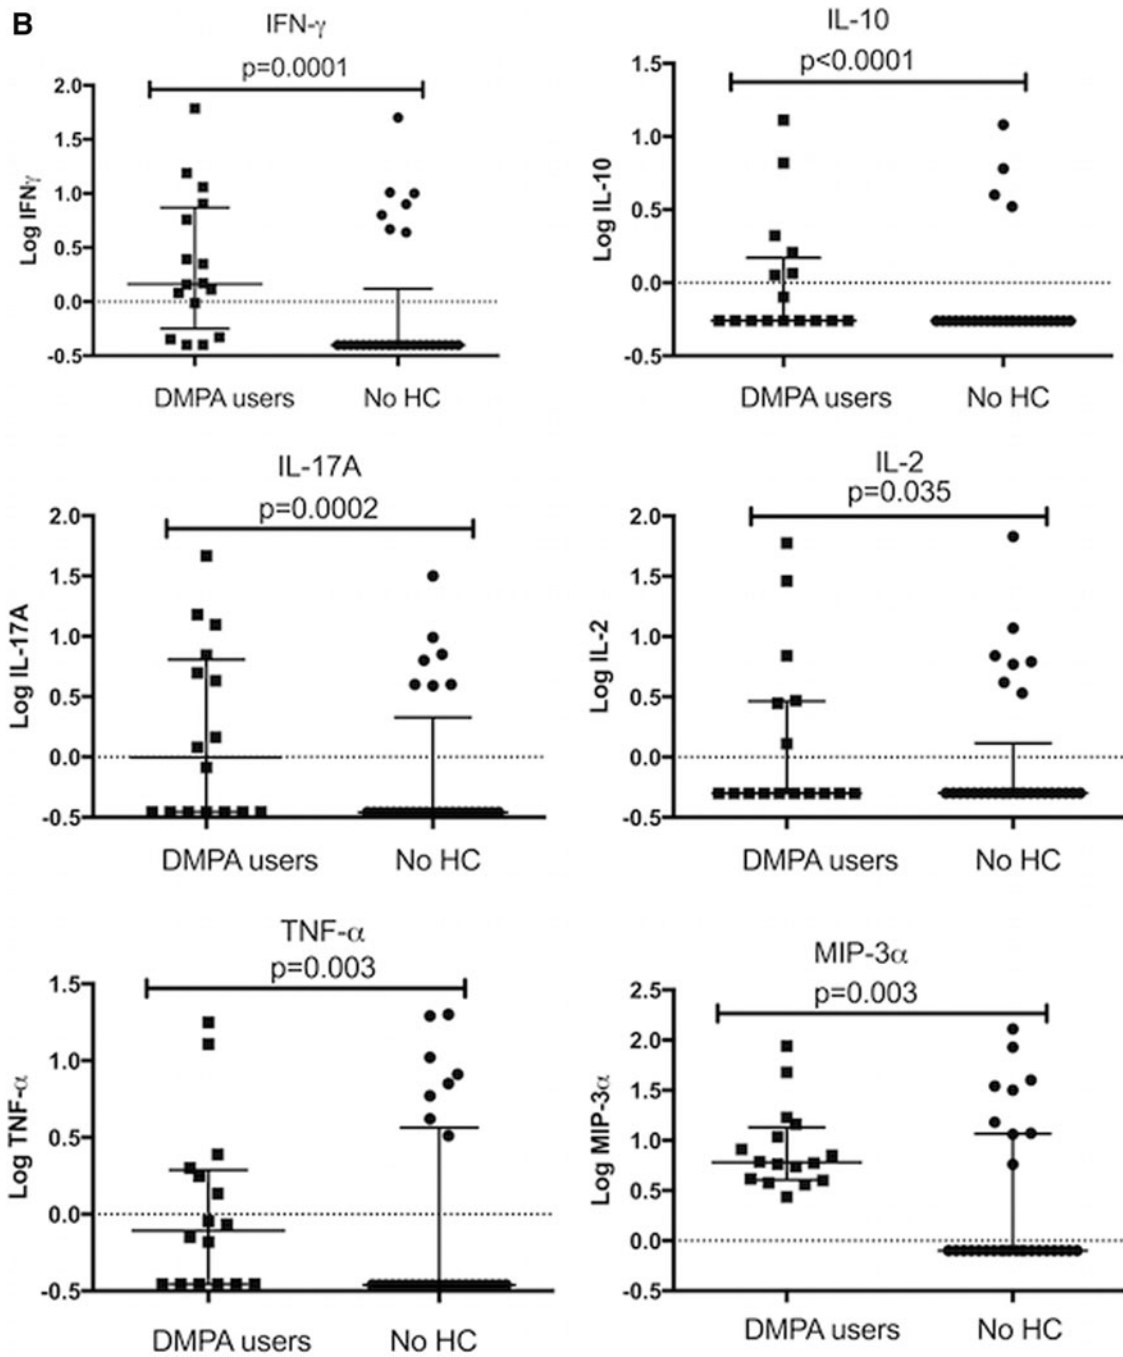

SUPPLEMENTARY FIG. S3. (Continued).
